# Supplementary material
Source: PubMed Central journal article supplement (PMC7149499)

1 **Supplemental Information**

2 **Table S1. Metabolic pathways changed by KSHV compared to uninfected TIME cells**  
3 **in 3D culture.**

4 Significantly affected metabolic pathway by KSHV with cut-off with impact  $>0.15$  and p-  
5 value  $<0.05$  are considered the most influenced pathways in TIME cells.

6

7 **Table S2. Metabolic pathways changed by KSHV compared to uninfected MCF10A**  
8 **cells in 3D culture.**

9 Significantly affected metabolic pathway by KSHV with cut-off with impact  $>0.15$  and p-  
10 value  $<0.05$  are considered the most influenced pathways in MCF10A cells.

11

12 **Table S3. Peptides of PYCR identified by mass spectrometry.**

13

14 **Table S4. Primers list for qPCR.**

15

16 **Fig. S1. Heat maps and PCA plots of metabolites in control and KSHV infected cells.**

17 (A) Clustered heatmap depicting levels of 176 metabolites in TIME cells, 165 metabolites  
18 in MCF10A cells. Columns indicate samples from 2D grown Mock or KSHV infected cells  
19 or 3D grown Mock or KSHV infected cells. Rows depict individual metabolites. (B)  
20 Principal component PCA score plots reveal separation in metabolite profiles between  
21 samples.

22

23 **Fig. S2. PYCR alteration profile in various cancer samples.**

24 (A) *PYCR1* and (B) *PYCR2* alterations (Mutation, Deletion, Amplification) were detected  
25 and visualized from cBioPortal.

26

27 **Fig. S3. K1-PYCR interaction and mapping.**

28 (A) A series of GST-K1 cytoplasmic region mutants depicted in the upper panel were  
29 transfected into HEK293T cells. Cell lysates were used for GST PD, followed by  
30 immunoblotting with anti-PYCR1, anti-PYCR2 and anti-GST antibodies. (B) A series of  
31 GST-PYCR2 truncated mutants depicted in the upper panel were co-transfected with full-  
32 length K1 in HEK293T cells. Cell lysates were then applied to GST-PD, followed by  
33 immunoblotting with anti-PYCR1, anti-PYCR2 and anti-GST antibodies. (C) *In vitro* GST-  
34 PD assay. Purified GST-K1(C) and GST-K1(C)pY proteins from *E. coli* TKX1 strain were  
35 stained by Coomassie blue and their tyrosine phosphorylation were examined with anti-  
36 phosphotyrosine (p-Tyr) antibody. Purified His-tagged PYCR2 (His-PYCR2) were  
37 incubated with GST, GST-K1(C) or GST-K1(C)pY for GST-PD. Input represents 10% of  
38 samples used *in vitro* binding assay. Arrowhead indicates the His-PYCR2 and asterisks  
39 indicate GST, GST-K1 and GST-K1(C)pY. (D) The cytoplasmic domain of K1 A, B, C and  
40 D subtypes fused with GST depicted in the upper panel were transfected into HEK293T  
41 cells. Cell lysates were used for GST-PD, followed by immunoblotting with anti-PYCR1,  
42 anti-PYCR2 and anti-GST antibodies. (E) The cytoplasmic domain of LMP2, R1, and K1  
43 fused with GST were transfected into HEK293T cells. Cell lysates were used for GST-PD,  
44 followed by immunoblotting with anti-PYCR1, anti-PYCR2 and anti-GST antibodies.

45

46 **Fig. S4. Mitochondria localization of K1 B, C and D subtypes.**

47 (A) Subcellular fractionation of mock- or K1-transfected HEK293T cells to cytosolic (Cyto),  
48 plasma membrane (PM), mitochondrial (Mito) and nuclear (Nu) fractions. K1 was detected  
49 by immunoblotting with anti-K1 antibody. Arrowhead indicates 46 kDa K1 and asterisk  
50 indicates 70 kDa glycosylated K1. Mitofillin,  $\beta$ -actin, Histone H3 and Na-K-ATPase were  
51 used as organelle-specific markers of mitochondria, cytosol, nucleus, and plasma  
52 membrane respectively. (B) Representative confocal fluorescence images of K1 subtypes  
53 in Hela cell. At 48 hours of transfection of the C-terminal Flag-tagged K1, Hela cells were  
54 stained with mitotracker, anti-PYCR2 antibody and anti-K1 antibody. Merged images of  
55 K1 (Red) and PYCR2 (Green) and nucleus (Blue). Scale bar=10  $\mu$ m.

56

57 **Fig. S5. Expression of K1 in 2D and 3D culture.**

58 (A) TIME and (B) MCF10A cells cultured in 2D and 3D condition were harvested to  
59 determine KSHV gene expression by RT-qPCR. Data represents normalized (with actin  
60 mRNA) fold change (3D/2D). Data are presented as the mean  $\pm$  SEM. \*,  $P < 0.05$ ; \*\*,  $P <$   
61  $0.01$ ; \*\*\*,  $P = 0.0002$ , by Student's t test.

62

63 **Fig. S6. Relative abundance of metabolites in proline metabolic pathway measured**  
64 **by LC-MS.**

65 Fold changes in metabolite associated with proline metabolic pathway in Mock, KSHV WT  
66 infected and KSHV K1 $\Delta$ C infected TIME cells. The level of each metabolite in Mock cells  
67 was set at 1. Data are mean  $\pm$  SD. \*,  $P < 0.05$ ; \*\*,  $P < 0.01$ , by 1-way ANOVA.

68

69 **Fig. S7. K1 expression in TIME, MCF10A and MDA-MB-231 cells and PYCR1/2**  
70 **knockdown in TIME and KMM cells.**

71 (A) Immunoblotting analysis of K1 and mutant expression in TIME cells. (B) Proliferation  
72 rate of mock-, K1 WT-, or mutant-overexpressing TIME cells in 2D monolayer. Proliferation  
73 was measured by counting the cell numbers. Data are presented as the mean  $\pm$  SEM. (C)  
74 Immunoblotting analysis of K1 and mutant expression in MCF10A cells. (D) Proliferation  
75 rate of mock-, K1 WT-, or mutant-overexpressing MCF10A cells in 2D monolayer.  
76 Proliferation was measured by counting cell numbers. Data are presented as mean  $\pm$  SEM.  
77 (E) Immunoblotting analysis of K1 and mutant expression in MDA-MB-231. (F)  
78 Proliferation rate of mock-, K1 WT-, or mutant-overexpressing MDA-MB-231 cell in 2D  
79 monolayer. Proliferation was measured by counting the cell numbers. Data are presented  
80 as the mean  $\pm$  SEM. (G) Immunoblotting analysis of K1, K1 mutant or PYCR1/2 expression  
81 in TIME cells transfected with scramble shRNA control or PYCR-specific shRNA.  $\beta$ -Actin  
82 was used as loading control. (H) Proliferation rate of mock-, K1 WT-, or mutant-  
83 overexpressing and/or PYCR1/2-knockdown TIME cells in 2D monolayer. Proliferation  
84 was measured by counting the cell number. Data are presented as the mean  $\pm$  SEM. (I)  
85 Immunoblotting analysis of PYCR1/2 expression in scramble shRNA- or PYCR-specific  
86 shRNA-treated KSHV infected TIME cells (J) KMM cells.

87

88 **Fig. S8. 3D hydrogel scaffolds for endothelial cell growth.**

89 (A) 3D printed hydrogel scaffolds designed to feature the shape of a hexagonal prism  
90 (diagonal length: 3 mm; height: 3 mm) consisting of parallel microchannels (diameter: 150  
91  $\mu$ m) Scale bar: 500  $\mu$ m. (B) Schematic diagram depicting 3D cell culture in the hydrogel  
92 scaffolds.

- 93 **Fig. S9. Targeted metabolomics profile of mock-, K1 WT- or mutant-expressing**  
94 **MDA-MB-231 tumors from nude mice.**
- 95 Heat map generated from  $\log_2$  value of fold-change compared to mock tumors (n = 3-4).

**Table S1. Metabolic pathways changed by KSHV compared to uninfected TIME cells in 3D culture.**

| Pathway                                     | P-value     | Impact  |
|---------------------------------------------|-------------|---------|
| Alanine, aspartate and glutamate metabolism | 0.000013073 | 0.48718 |
| Cysteine and methionine metabolism          | 0.0017537   | 0.1703  |
| Arginine and proline metabolism             | 0.0019014   | 0.28937 |
| Thiamine metabolism                         | 0.017911    | 0.15346 |
| Pantothenate and CoA biosynthesis           | 0.024622    | 0.18014 |
| D-Glutamine and D-glutamate metabolism      | 0.026424    | 0.28342 |

**Table S2. Metabolic pathways changed by KSHV compared to uninfected MCF10A cells in 3D culture.**

| Pathway                                     | P-value    | Impact  |
|---------------------------------------------|------------|---------|
| Glutathione metabolism                      | 0.00011031 | 0.26552 |
| Taurine and hypotaurine metabolism          | 0.00067474 | 0.36331 |
| Alanine, aspartate and glutamate metabolism | 0.0013899  | 0.54416 |
| Glycine, serine and threonine metabolism    | 0.0030097  | 0.18845 |
| Arginine and proline metabolism             | 0.0050402  | 0.23591 |

**Table S3. Peptides of PYCR identified by mass spectrometry.**

| Bands             | Protein | Total Peptides | Peptides detected           |
|-------------------|---------|----------------|-----------------------------|
| P35               | PYCR1   | 21             | (R) ELQSMADQEQVSPAAIK       |
|                   |         |                | (K) IMASSPDMDLATVSALR       |
|                   |         |                | (R) EGATVYATGTHAQVEDGR      |
|                   |         |                | (K) VKLDSPAGTALSPSGHTK      |
|                   |         |                | (F) ILDEIGADIEDR            |
|                   |         |                | (R) HIVVSCAAGVTISSIEK       |
|                   |         |                | (F) TALDALADGGVK            |
|                   |         |                | (R) ELQSMADQEQVSPAAIK       |
|                   |         |                | (K) MLLHSEQHPGQLK           |
|                   |         |                | (K) LDSPAGTALSPSGHTK        |
|                   |         |                | (K) GFTAAGVLAHK             |
|                   |         |                | (F) TAAGVLAHK               |
|                   |         |                | (F) ILDEIGADIEDR            |
|                   |         |                | (K) DNVSSPGGATIHALHVLESGGFR |
|                   |         |                | PYCR2                       |
| (R) SLLINAVEASCIR |         |                |                             |
| P32               | PYCR1   | 2              | (R) ELQSMADQEQVSPAAIK       |
|                   |         |                | (K) MLLHSEQHPGQLK           |
|                   | PYCR2   | 1              | (R) SLLINAVEASCIR           |

**Table S4. List of primers used in this study.**

| Gene    | Primer                   |
|---------|--------------------------|
| Actin_F | CCACAGCCAGAGGTCCTCAG     |
| Actin_R | AGGAGCTCTTGGAGGGCATG     |
| K1_F    | TACGCTGATGGACCAAACGG     |
| K1_F    | ACGCGCCGAAAAACATAGAC     |
| LANA_F  | GAAGTGGATTACCCTGTTGTTAGC |
| LANA_R  | TTGGATCTCGTCTTCCATCC     |
| ORF36_F | ATTGCCAACGACCTGATGCA     |
| ORF36_R | ACTCCAGTCCAGCTGCAGCA     |
| ORF57_F | AGGGATATCACCGCTCTCATAAGA |
| ORF57_R | CTGCGGTTTCTCGACGGCAACTCA |
| RTA_F   | CACAAAATGGCGCAAGATGA     |
| RTA_R   | TGGTAGAGTTGGGCCTTCAGTT   |



**Fig. S1. Heat maps and PCA plots of metabolites in control and KSHV infected cells**

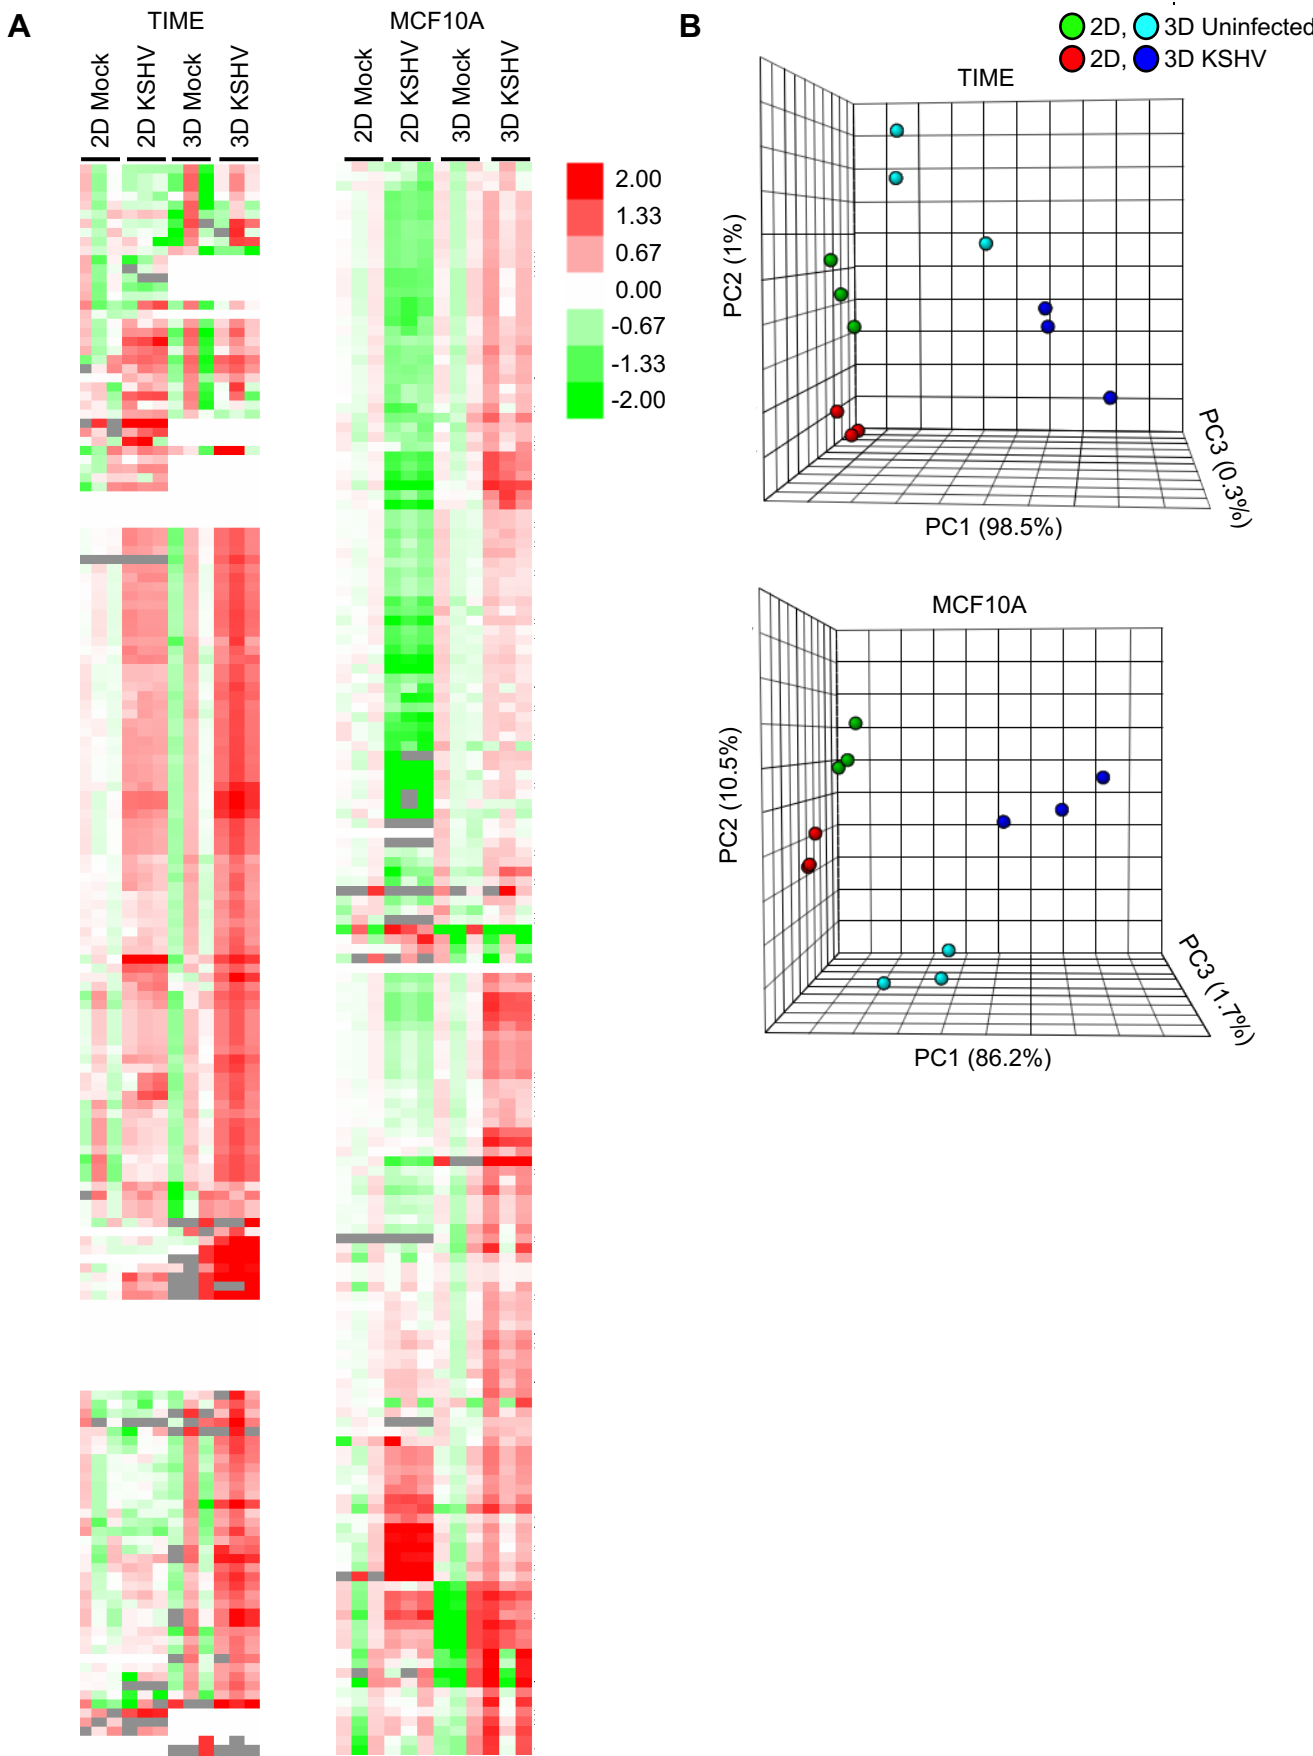

Fig. S2. *PYCR* alteration profile in various cancer samples

A

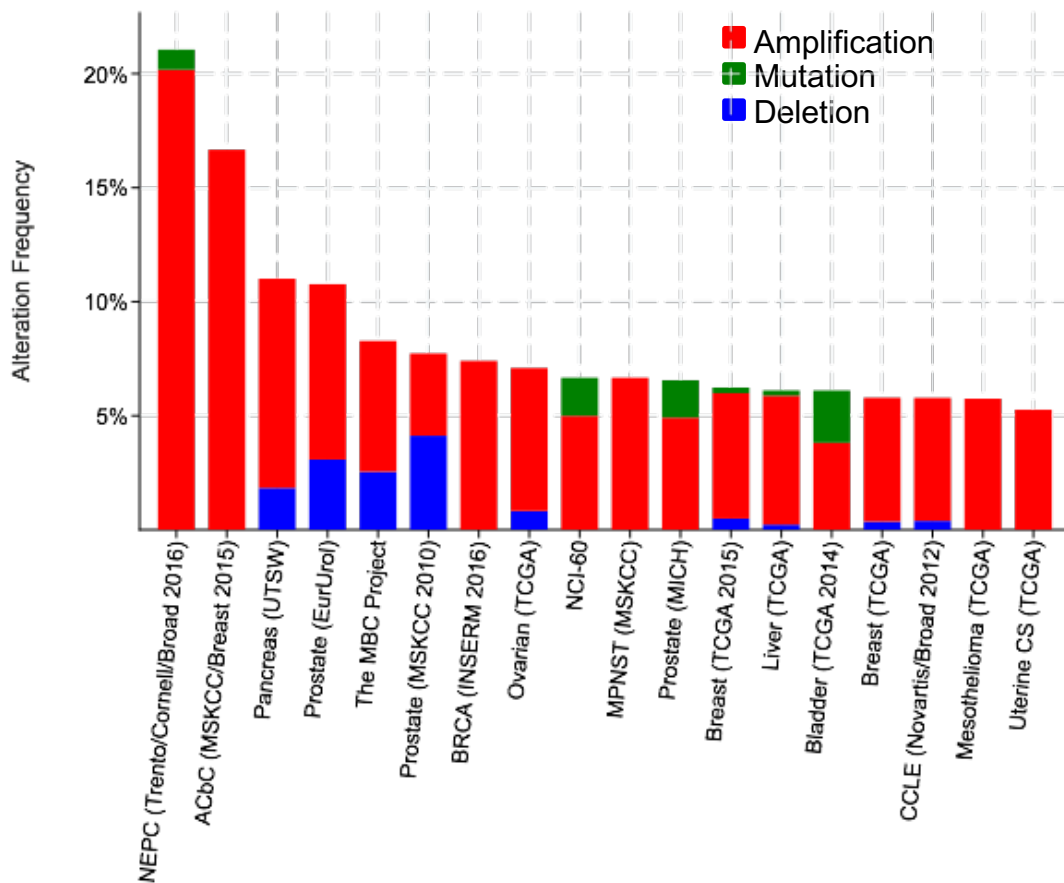

B

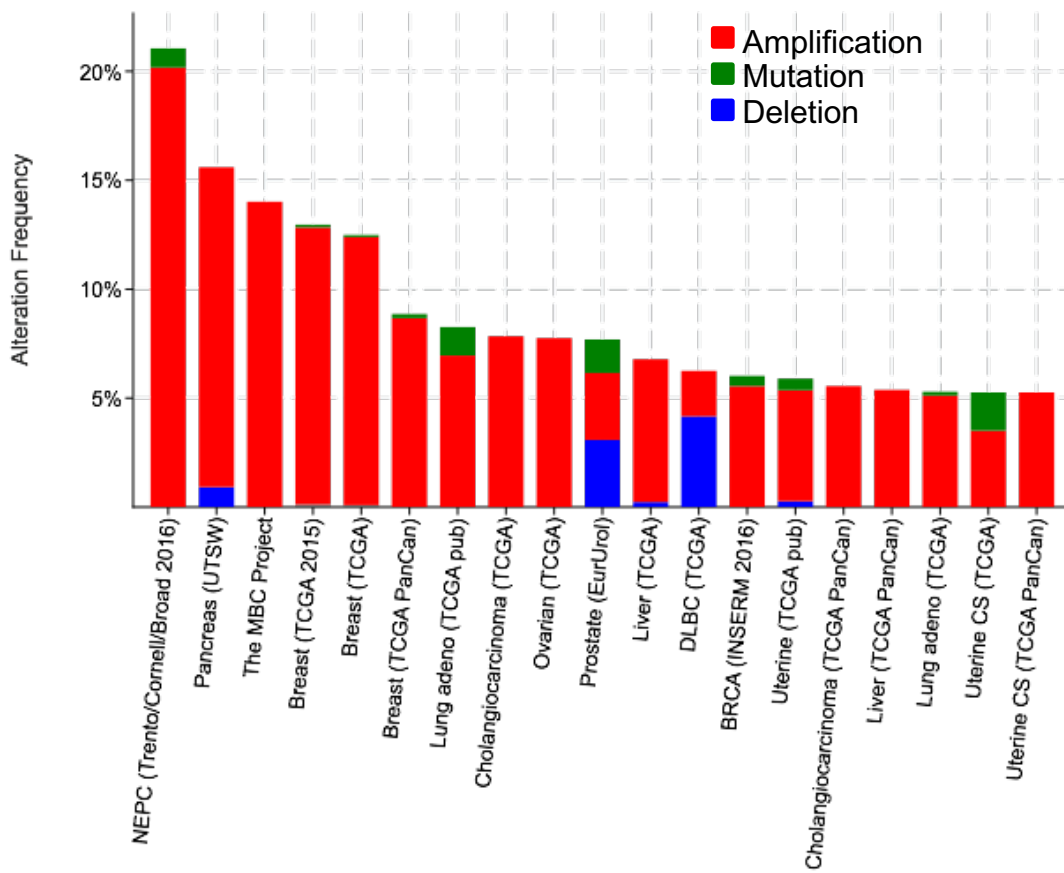

# Fig. S3. K1-PYCR interaction and mapping

**A**

TYF T I I F A H C Q K Q R D S N K T V P Q Q L Q D F F S L H D L C T E D F T Q P V D W Y  
 C42 T I I F A H C Q K Q R D S N K T V P Q Q L Q D Y Y S L H D L C T E D Y T Q P V D W Y  
 C38 A H C Q K Q R D S N K T V P Q Q L Q D Y Y S L H D L C T E D Y T Q P V D W Y  
 C34 K Q R D S N K T V P Q Q L Q D Y Y S L H D L C T E D Y T Q P V D W Y  
 C28 K T V P Q Q L Q D Y Y S L H D L C T E D Y T Q P V D W Y  
 C24 Q Q L Q D Y Y S L H D L C T E D Y T Q P V D W Y  
 C19 Y Y S L H D L C T E D Y T Q P V D W Y

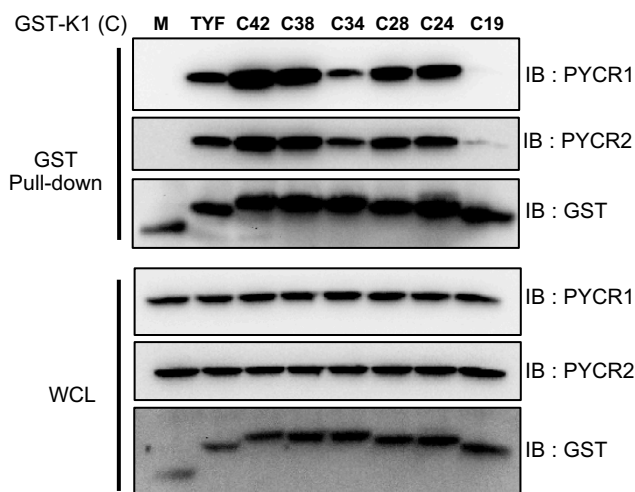

**C**

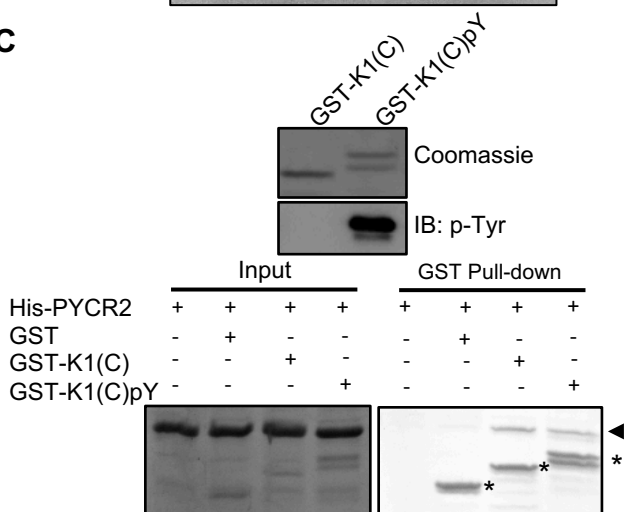

**E**

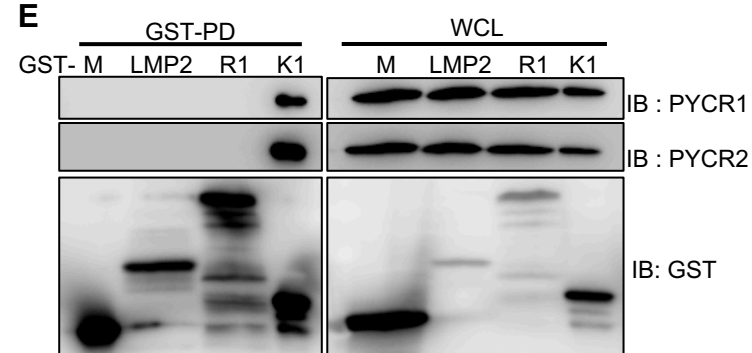

**B**

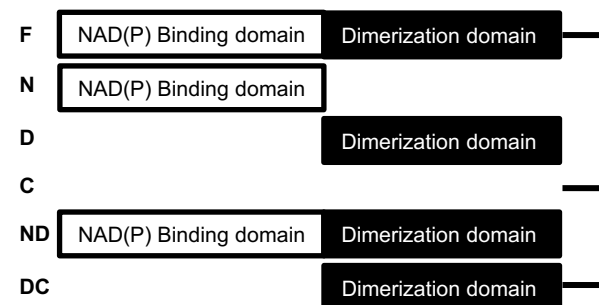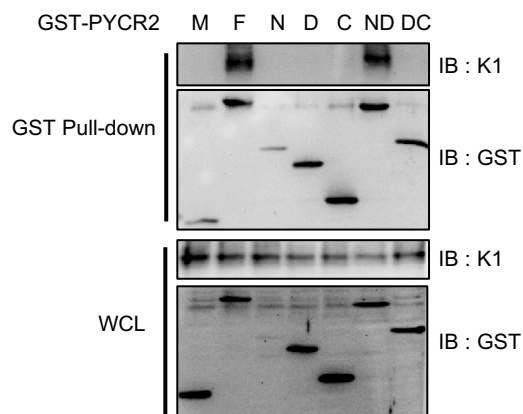

**D**

**A-APK1** T I I F A H C R K Q R D S N K T V P Q Q L Q D Y Y S L H D L C T E D Y T Q P V D W Y  
**A-BCBL** T I I F A H C Q K Q R D S N K T V P Q Q L Q D Y Y S L H D L C T E D Y T Q P V D W Y  
**B-59/Sir** T L I F T H C Q K K S D S S K T G Q Q L R D Y Y S L D Y F H T E Y T Q P V D W Y  
**B-60/Ced** T I I F A H C Q K Q S D S S K T G Q Q L R D Y Y S L D H F H T E D Y T Q P V N W Y  
**C-JSC1** T I I F A H C Q K Q S D S N K T V P Q Q L Q D Y Y S L H D L C T E D Y T Q P V D W Y  
**D-ZSK3** T I I F A R C Q K Q S D S N K T V P Q Q L R D Y Y S L H D F I T E D Y M Q P V D W Y

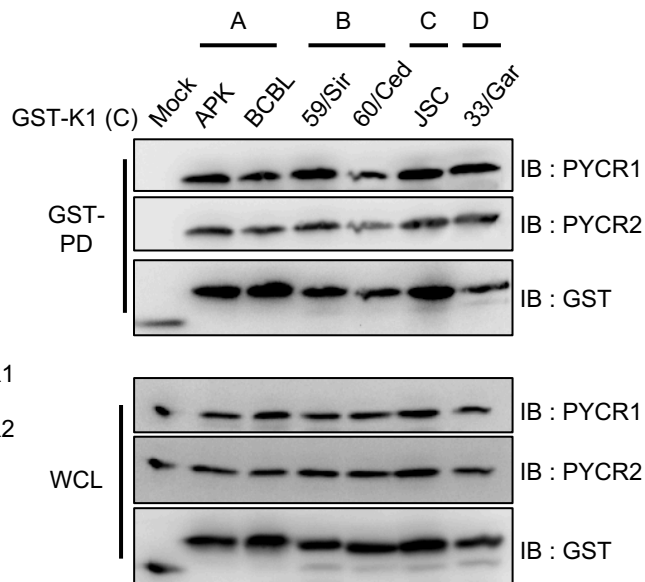

**Fig. S4. Mitochondria localization of K1 B,C and D subtypes**

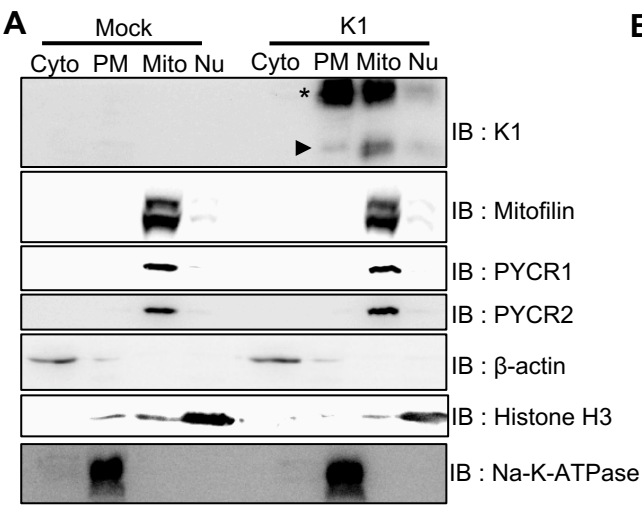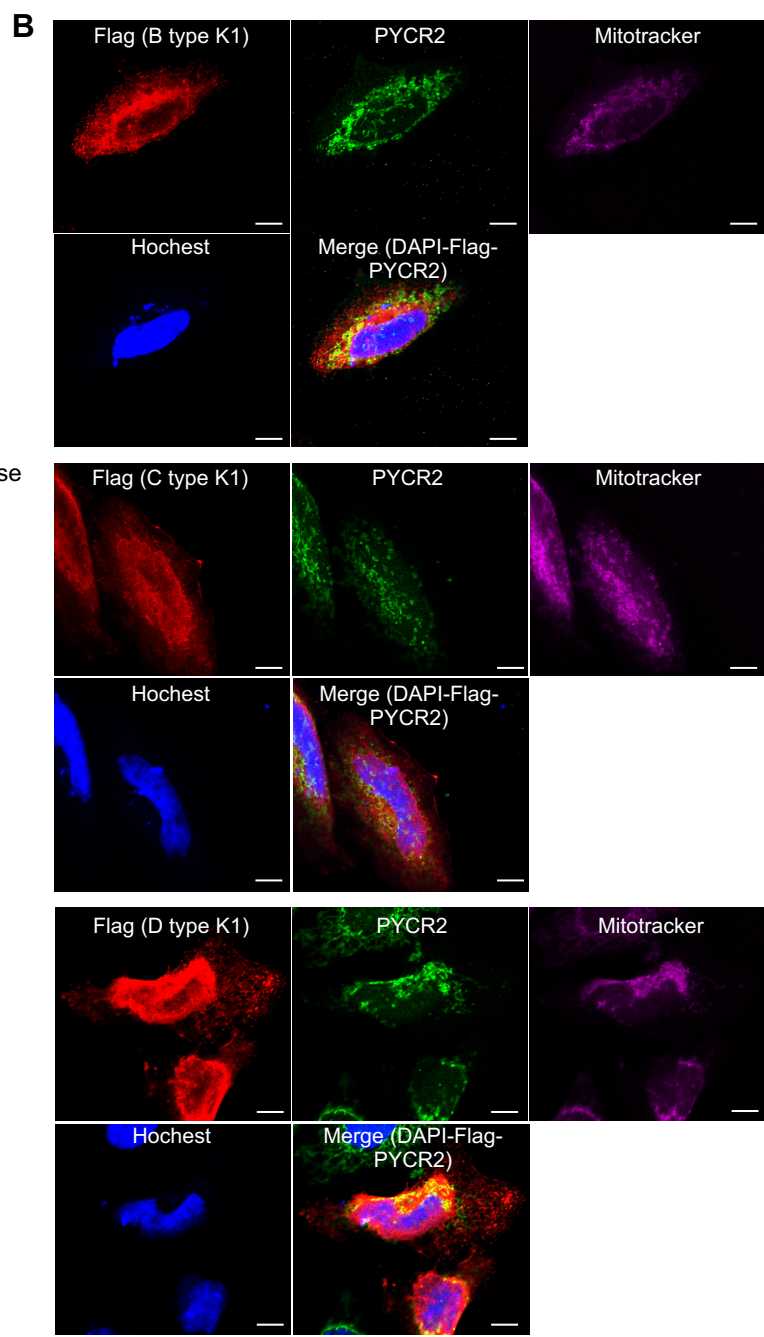

**Fig. S5. Expression of K1 in 2D and 3D culture**

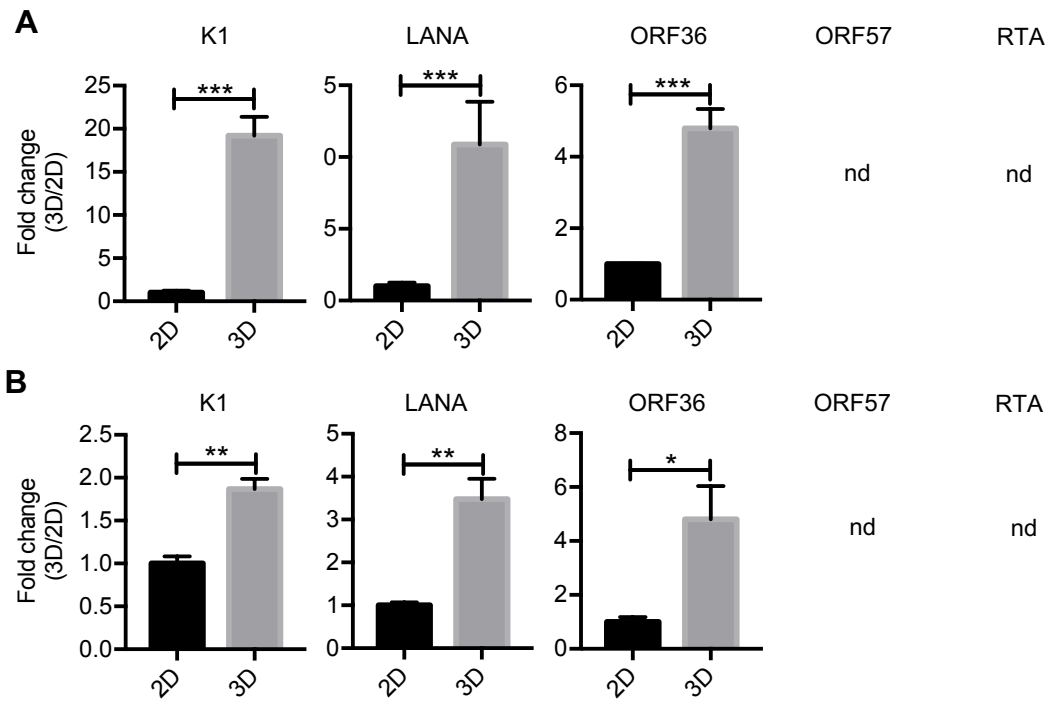

**Fig. S6. Relative content of metabolites in proline metabolic pathway measured by LC-MS**

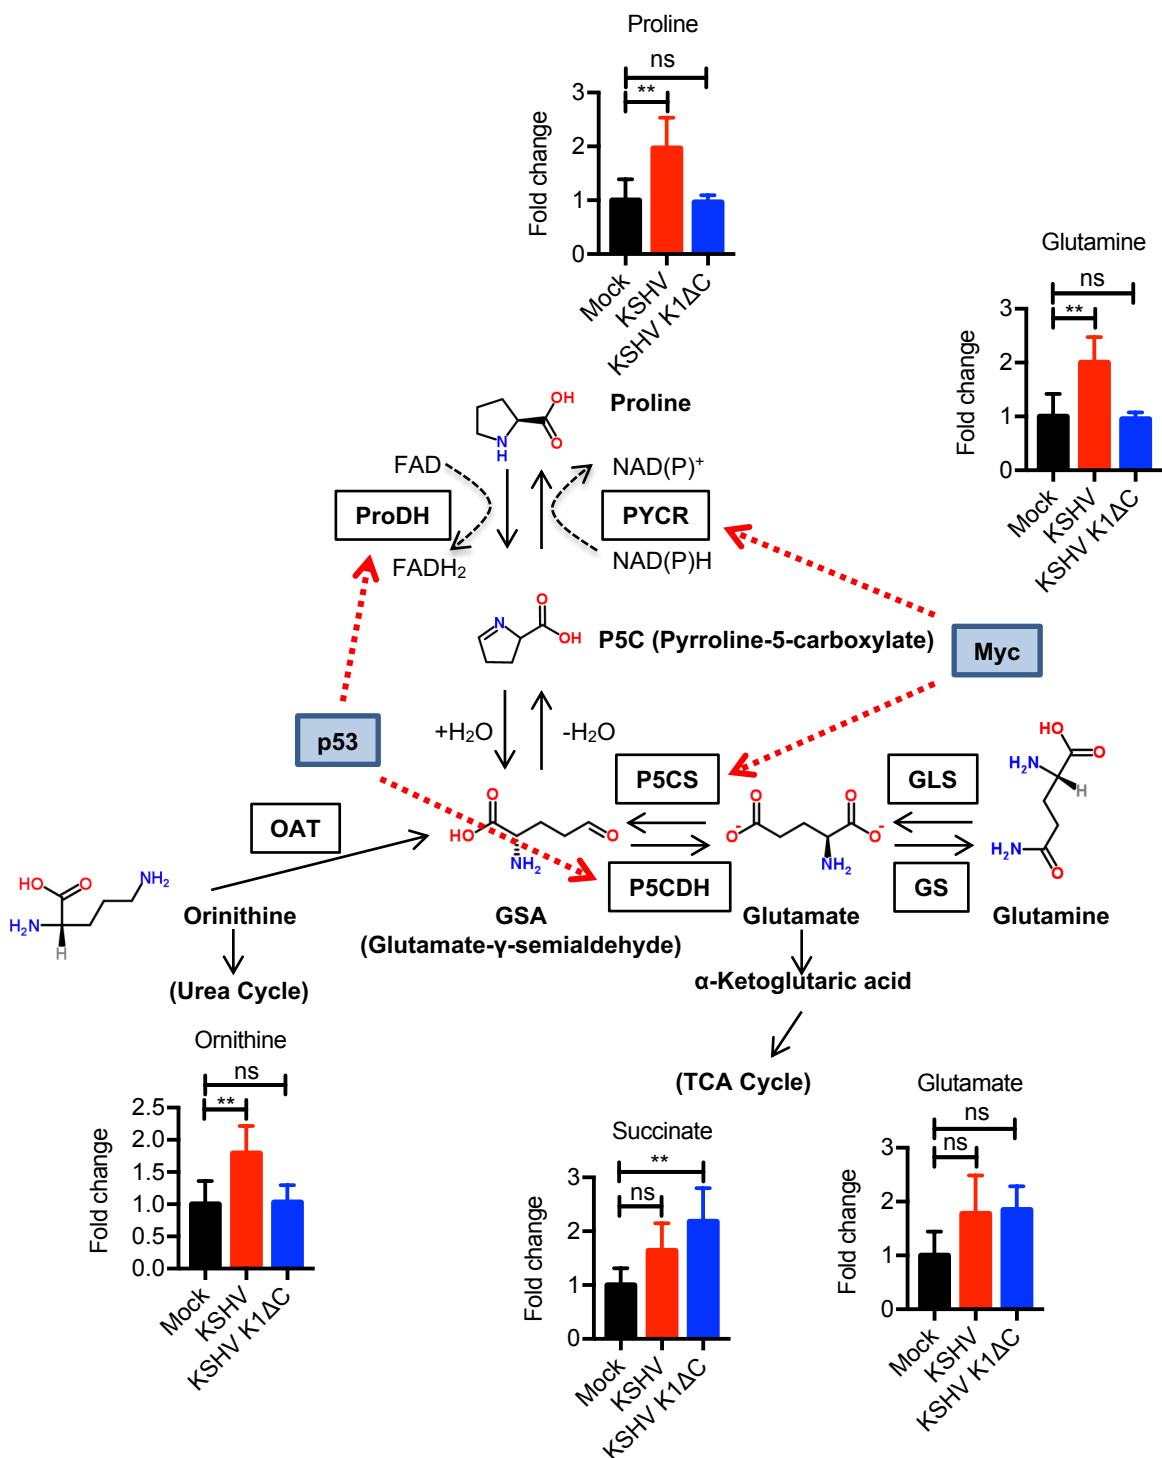

**Fig. S7. Stable expression of K1 in TIME, MCF10A and MDA-MB-231 cell lines and Knockdown of PYCR1 and PYCR2 in TIME and KMM cell lines**

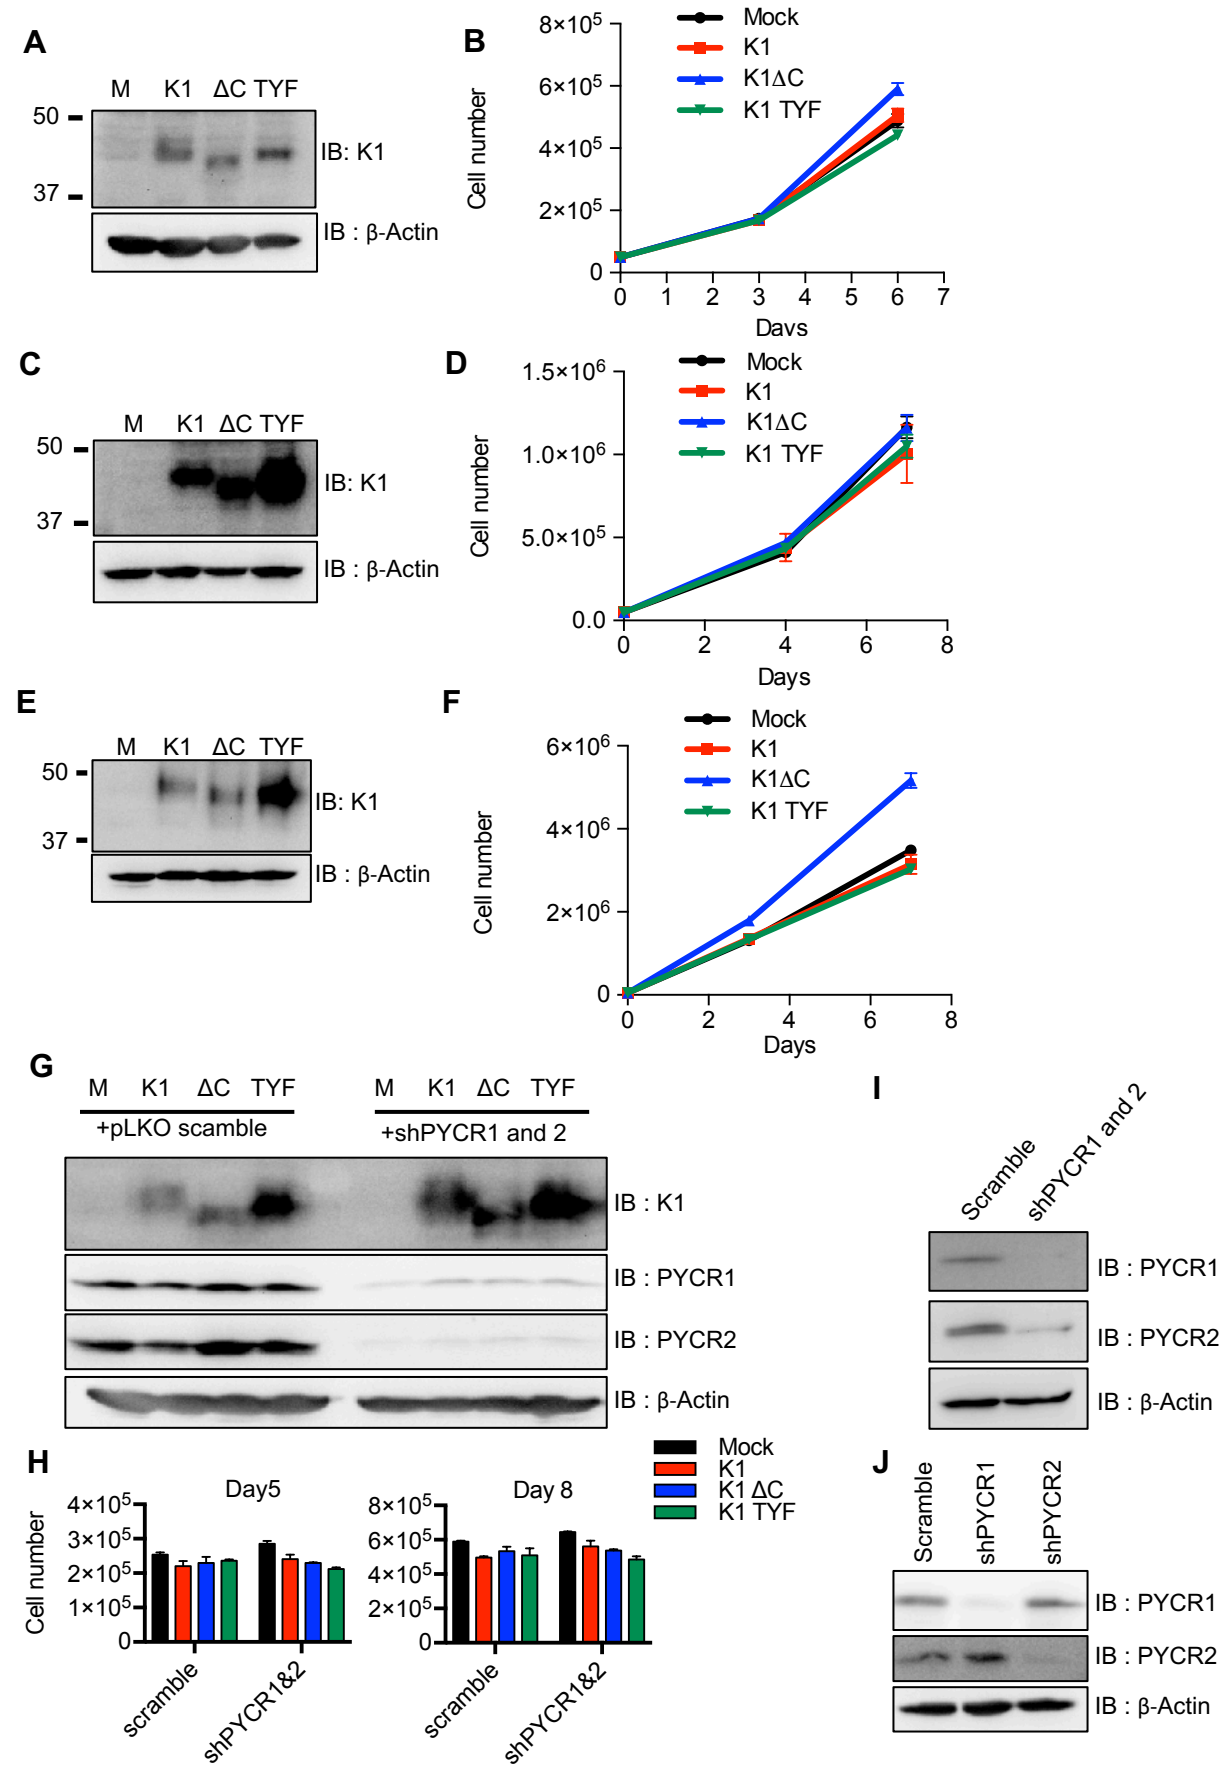

**Fig. S8. 3D hydrogel scaffolds for endothelial cell growth**

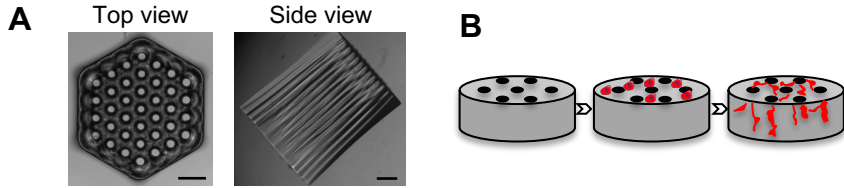



**Fig. S9. K1 WT and K1 TYF induce tumorigenesis**

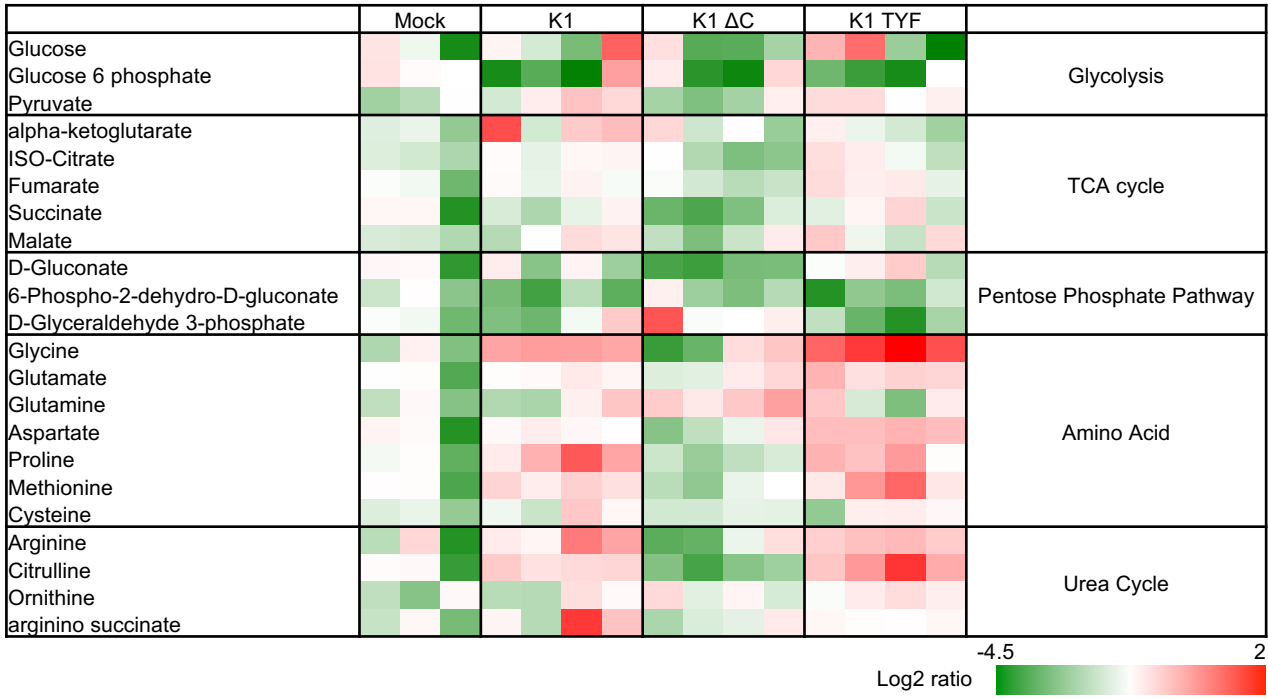

Supplement: pnas.1918607117.sapp.pdf [file pnas.1918607117.sapp.pdf]
